# Supplementary material for: Optimising PHBV biopolymer production in haloarchaea via CRISPRi-mediated redirection of carbon flux
Source: PubMed Central journal article supplement (PMC8387396; doi:10.1038/s42003-021-02541-z), 2021-08-25
Supplement: 42003_2021_2541_MOESM2_ESM.pdf [file 42003_2021_2541_MOESM2_ESM.pdf]

## Supplementary information

### Optimising PHBV biopolymer production in haloarchaea *via* CRISPRi-mediated redirection of carbon flux

Lin Lin<sup>1,2</sup>, Junyu Chen<sup>1</sup>, Ruchira Mitra<sup>1,3</sup>, Quanxiu Gao<sup>1</sup>, Feiyue Cheng<sup>1,2</sup>, Tong Xu<sup>1</sup>, Zhenqiang Zuo<sup>1</sup>, Hua Xiang<sup>1,2,\*</sup> & Jing Han<sup>1,2,\*</sup>

#### Affiliations

<sup>1</sup> State Key Laboratory of Microbial Resources, Institute of Microbiology, Chinese Academy of Sciences, Beijing 100101, People's Republic of China

<sup>2</sup> College of Life Science, University of Chinese Academy of Sciences, 100049, Beijing, People's Republic of China

<sup>3</sup> International College, University of Chinese Academy of Sciences, 100049, Beijing, People's Republic of China

#### Supplementary Methods

##### CR-RT-PCR (circularized RNA reverse transcription PCR)

The circularized RNA reverse transcription PCR (CR-RT-PCR) was used to identify the transcription start site (TSS) as previously described<sup>1</sup>. The cDNA was prepared by reverse transcription of self-ligated RNA with random hexamer primers (Thermo Fisher Scientific, USA), which was used as the PCR template. The PCR products amplified with the primer pairs CR-XX-F/R (Table S2) were cloned into the pMD18-T vector to determine the TSS by DNA sequencing.

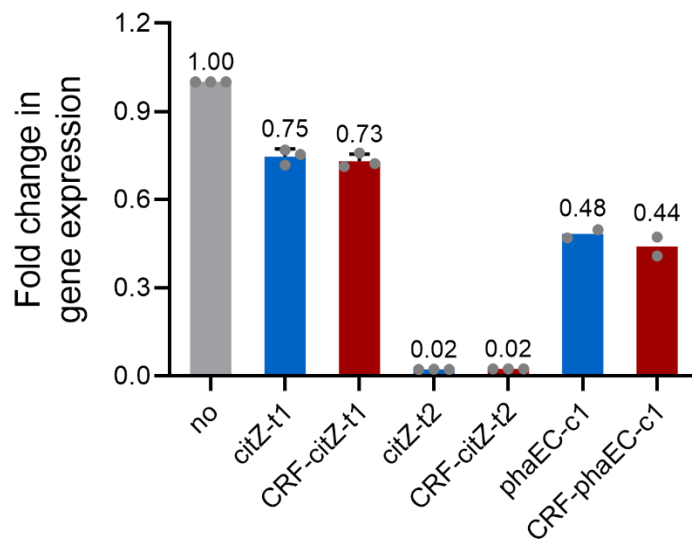

23

24 **Supplementary Fig. 1. The repression effects produced by three crRNAs before**  
 25 **and after the knockout of CRISPR arrays.** The gray column represents the control  
 26 with no crRNA expression. The blue columns represent the inhibition before knockout  
 27 of CRISPR arrays, and the red columns represent the inhibition after knock outing  
 28 CRISPR arrays (CRF). Data shown for two or three biological replicates. Error bars  
 29 indicate SDs, n = 3.

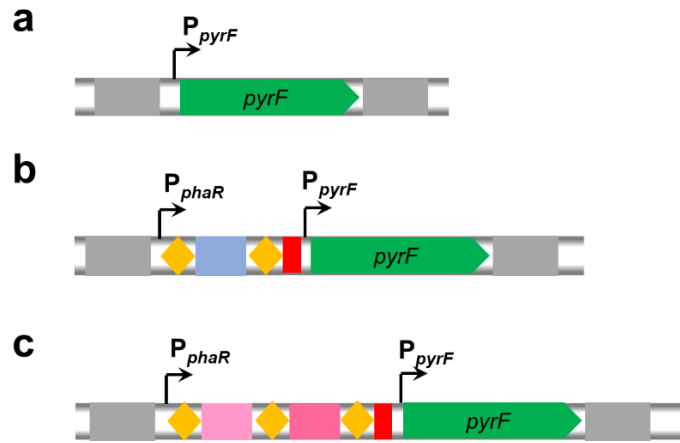

30

31

32 **Supplementary Fig. 2. Chromosomal integration of crRNA expression**

33 **cassette at the original locus of *pyrF* gene in the genome. a** The inserted fragment of

34 *pyrF* gene. **b** The inserted fragment of *pyrF* gene and mini-CRISPR structure for

35 expressing NT. **c** The inserted fragment of *pyrF* gene and mini-CRISPR structure for

36 expressing *citZ-t2* and *gltA-t1*. The transcription of crRNA and *pyrF* gene are driven

37 by  $P_{phaR}$  and  $P_{pyrF}$ , respectively. Repeats, orange diamonds; NT spacer, light blue; *citZ*

38 -*t2*, light pink; *gltA-t1*, pink; T8 terminator: red rectangle; Upstream and downstream

39 fragments of *pyrF*, grey rectangles.

40

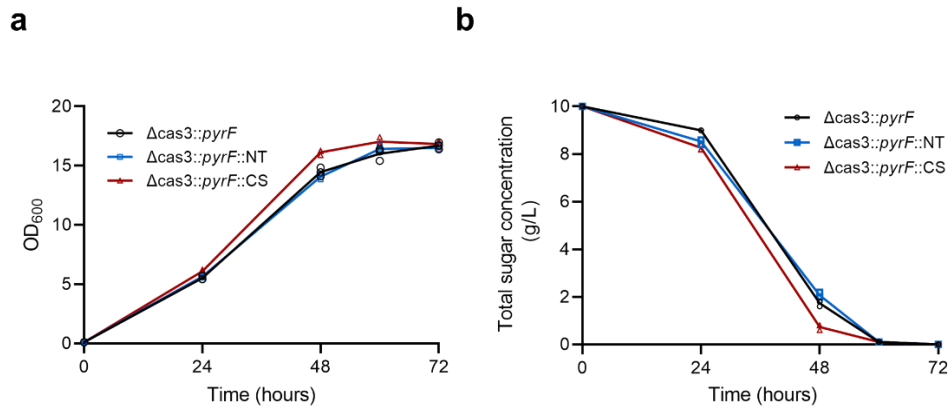

41

42 **Supplementary Fig. 3. *citZ* repression on cell growth and glucose consumption of**  
 43 ***H. mediterranei* via CRISPRi by chromosomal integration crRNA expression**  
 44 **system. a Cell growth. b Glucose consumption. Data shown for three biological**  
 45 **replicates.**

46

47 **Supplementary Table 1. PHBV accumulation by *H. mediterranei* strains with**  
 48 **citrate synthase genes repressed *via* CRISPRi by chromosomal integration crRNA**  
 49 **expression system<sup>a</sup>.**

| Strains                                | CDW<br>(g/L) <sup>b</sup> | PHBV<br>content<br>(%) <sup>c</sup> | PHBV<br>concentration<br>(g/L) | 3HV fraction<br>(mol%) | PHBV<br>productivity<br>(g/L·d) |
|----------------------------------------|---------------------------|-------------------------------------|--------------------------------|------------------------|---------------------------------|
| DF50ΔEPSΔ<br><i>cas3::pyrF</i>         | 9.02 ± 0.39               | 43.11 ± 1.39                        | 3.88 ± 0.08                    | 11.20 ± 0.48           | 1.29 ± 0.03                     |
| DF50ΔEPSΔ<br><i>cas3::pyrF::</i><br>NT | 8.91 ± 0.20               | 43.12 ± 2.69                        | 3.84 ± 0.19                    | 10.70 ± 0.36           | 1.28 ± 0.06                     |
| DF50ΔEPSΔ<br><i>cas3::pyrF::</i><br>CS | 9.16 ± 0.03               | 45.08 ± 1.18                        | 4.13 ± 0.12                    | 10.58 ± 0.37           | 1.38 ± 0.04                     |

50 <sup>a</sup>All data are expressed as mean ± standard deviations from three independent  
 51 experiments and strains were cultivated in MG medium for 3 days. <sup>b</sup>CDW, dry weight  
 52 of the cell (in grams) produced per liter of culture. <sup>c</sup>PHBV content, the weight percent  
 53 of PHBV in CDW.

54 **Supplementary Table 2. Strains used in this study.**

| Strains                                                          | Relevant characteristics                                                                          | Source or reference |
|------------------------------------------------------------------|---------------------------------------------------------------------------------------------------|---------------------|
| <i>E. coli</i> JM109                                             | <i>recA1 supE44 endA1 hsdR17 gyrA96 relA1 thi</i>                                                 | 2                   |
| <i>E. coli</i> JM110                                             | <i>dam dcm</i> mutant of <i>E. coli</i> JM109                                                     | 3                   |
| <i>H. mediterranei</i> DF50ΔEPS                                  | <i>pyrF</i> and HFX_2145-2148 deletion mutant of <i>H. mediterranei</i>                           | 4                   |
| <i>H. mediterranei</i> 50BΔ2549                                  | P <sub>phaR</sub> insertion and HFX_2549 deletion mutant of <i>H. mediterranei</i> DF50ΔEPS       | 5                   |
| <i>H. mediterranei</i> CRF                                       | CRISPR-free mutant of <i>H. mediterranei</i> DF50                                                 | 6                   |
| <i>H. mediterranei</i> DF50ΔEPSΔ <i>cas3</i>                     | <i>cas3</i> deletion mutant of <i>H. mediterranei</i> DF50ΔEPS                                    | This study          |
| <i>H. mediterranei</i> 50BΔ2549Δ <i>cas3</i>                     | <i>cas3</i> deletion mutant of <i>H. mediterranei</i> 50BΔ2549                                    | This study          |
| <i>H. mediterranei</i> CRFΔEPSΔ <i>cas3</i>                      | HFX_2145-2148 and <i>cas3</i> deletion mutant of <i>H. mediterranei</i> CRF                       | This study          |
| <i>H. mediterranei</i> DF50ΔEPSΔ <i>cas3</i> :: <i>pyrF</i>      | <i>pyrF</i> complementation mutant of DF50ΔEPSΔ <i>cas3</i>                                       | This study          |
| <i>H. mediterranei</i> DF50ΔEPSΔ <i>cas3</i> :: <i>pyrF</i> ::NT | <i>pyrF</i> complementation mutant and mini-CRISPR (NT) insertion mutant of DF50ΔEPSΔ <i>cas3</i> | This study          |
| <i>H. mediterranei</i> DF50ΔEPSΔ <i>cas3</i> :: <i>pyrF</i> ::CS | <i>pyrF</i> complementation mutant and mini-CRISPR (CS) insertion mutant of DF50ΔEPSΔ <i>cas3</i> | This study          |

55

56 **Supplementary References**

- 57 1. Kuhn, J. RT-PCR analysis of 5' to 3'-end-ligated mRNAs identifies the extremities  
58 of *cox2* transcripts in pea mitochondria. *Nucleic Acids Res.* 30, 439-446 (2002).
- 59 2. Sambrook, J., Fritsch, E. F. & Maniatis, T. *Molecular cloning: a laboratory manual*,  
60 2nd ed. Cold Spring Harbor Laboratory Press, Cold Spring Harbor, NY (1989).
- 61 3. Palmer, B. R. & Marinus, M. G. The *dam* and *dcm* strains of *Escherichia coli*--a  
62 review. *Gene.* 143, 1-12 (1994).
- 63 4. Zhao, D. H. et al. Improving polyhydroxyalkanoate production by knocking out the  
64 genes involved in exopolysaccharide biosynthesis in *Haloferax mediterranei*. *Appl.*  
65 *Microbiol. Biotechnol.* 97, 3027-3036 (2013).
- 66 5. Zuo, Z. Q. et al. Engineering *Haloferax mediterranei* as an efficient platform for  
67 high level production of lycopene. *Front. Microbiol.* 9 (2018).
- 68 6. Li, M. et al. Characterization of CRISPR RNA biogenesis and Cas6 cleavage-  
69 mediated inhibition of a provirus in the haloarchaeon *Haloferax mediterranei*. *J.*  
70 *Bacteriol.* 195, 867-875 (2013).
