# Supplementary material for: Optimising PHBV biopolymer production in haloarchaea via CRISPRi-mediated redirection of carbon flux
Source: PubMed Central journal article supplement (PMC8387396; doi:10.1038/s42003-021-02541-z), 2021-08-25
Supplement: 42003_2021_2541_MOESM3_ESM.pdf [file 42003_2021_2541_MOESM3_ESM.pdf]

## **Description of Additional Supplementary Files**

**File name:** Supplementary Data 1

**Description:** Plasmids used in this study.

**File name:** Supplementary Data 2

**Description:** Primers and mini-CRISPR assay sequences used in this study.

**File name:** Supplementary Data 3

**Description:** Raw data for Fig. 2-6. In total, there are 15 sheets. Each sheet shows the raw data for each individual figure. The sheets are named according to the figure number.
